# Supplementary material for: Nitrogen-doped nanocarbon as a metal-free catalyst for CO2 hydroboration
Source: Royal Society of Chemistry journal article supplement (doi:10.1039/d4nr04225e), 2024-11-25
Supplement: d4nr04225e1.pdf [file d4nr04225e1.pdf]

## Nitrogen Doped Nanocarbon as Metal-Free Catalyst for CO<sub>2</sub> Hydroboration

Tao Du,<sup>a,b,c</sup> Peng Zhang,<sup>b\*</sup> Guofeng Wang,<sup>b</sup> Zhen Jiao,<sup>a</sup> Jiancheng Zhou,<sup>a</sup> and Yuxiao Ding<sup>b\*</sup>

<sup>a</sup> School of Chemistry and Chemical Engineering, Southeast University, 2 Dongnandaxue Rd, Nanjing 211189, Jiangsu, Peoples R China

<sup>b</sup> State Key Laboratory of Low Carbon Catalysis and Carbon Dioxide Utilization, Lanzhou Institute of Chemical Physics, Chinese Academy of Sciences, Lanzhou 730000, Gansu, Peoples R China

<sup>c</sup> Joint Research Institute Southeast University & Monash University, Suzhou 215123, Jiangsu, Peoples R China.

\* Correspondence author: [zhangpengz@licp.cas.cn](mailto:zhangpengz@licp.cas.cn); [yuxiaoding@licp.cas.cn](mailto:yuxiaoding@licp.cas.cn)

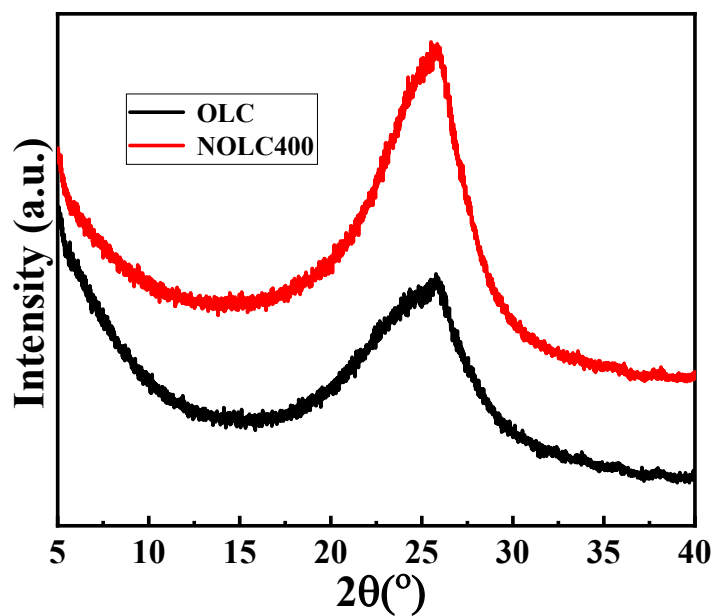

Fig. S1 The XRD spectra of OLC1500 and NOLC400. Collected in X-ray diffractometer (SmartLab 3KW, Rigaku Corporation)

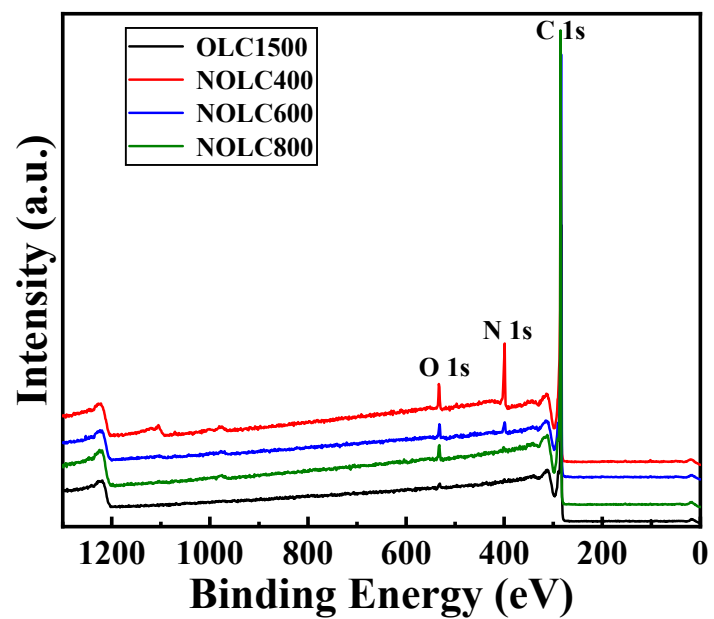

Fig. S2 The XPS survey of OLC1500 and NOLCx catalysts

**Table S1 Elemental composition of samples from XPS analysis**

| <b>Sample</b> | <b>C/%</b> | <b>O/%</b> | <b>N/%</b> |
|---------------|------------|------------|------------|
| OLC           | 98.3       | 1.7        | -          |
| NOLC400       | 86.3       | 3.0        | 10.7       |
| NOLC600       | 95.2       | 2.2        | 2.6        |
| NOLC800       | 96.5       | 2.5        | 0.9        |

**Table S2 The surface area and porosity of samples**

| <b>Sample</b> | <b>Surface area</b><br>m <sup>2</sup> /g | <b>Pore Volume</b><br>cm <sup>3</sup> /g | <b>Mean Pore Size</b><br>nm |
|---------------|------------------------------------------|------------------------------------------|-----------------------------|
| OLC           | 435.7                                    | 1.48                                     | 13.6                        |
| NOLC400       | 230.7                                    | 0.91                                     | 15.4                        |
| NOLC600       | 307.8                                    | 1.01                                     | 14.9                        |
| NOLC800       | 369.1                                    | 1.18                                     | 12.8                        |

## The gas product composition analyzed by GC

The gaseous products from the CO<sub>2</sub> hydroboration catalyzed by NOLC400 are analyzed using the gas chromatography (GC9720 plus, Fuli) equipped with two FID detectors and one TCD detector (reaction condition: 10 mg NOLC400, 2 mmol HBpin, 100 °C, 4 MPa CO<sub>2</sub>, 2 h). The high-concentration gas products are analyzed using the TCD detector. Low-concentration CO would be transformed into CH<sub>4</sub> and then analyzed using the FID 1 detector. The gaseous hydrocarbons are analyzed by FID 2 detector, such as CH<sub>4</sub>, C<sub>2</sub>H<sub>2</sub>, C<sub>2</sub>H<sub>4</sub>, C<sub>2</sub>H<sub>6</sub>, C<sub>3</sub>H<sub>6</sub> and so on. According to the TCD signal, a small amount of H<sub>2</sub> is produced (3200ppm) from the decomposition of borane apart from the reactant CO<sub>2</sub>. The small amount of O<sub>2</sub> (1600ppm) and N<sub>2</sub> (11333ppm) are from the leakage of air during sampling. From the FID 1 signal, only negligible amounts of CO and CH<sub>4</sub> are found to be produced during CO<sub>2</sub> hydroboration. Meanwhile, no other gaseous hydrocarbons were generated.

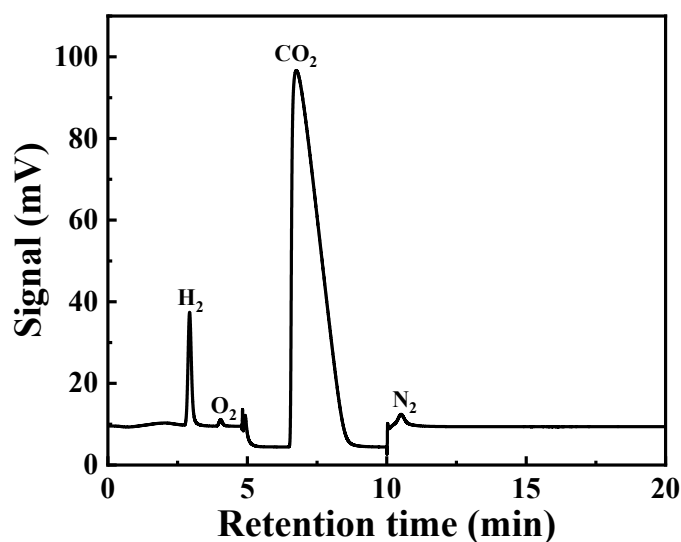

Fig. S3 TCD signal of the gas product

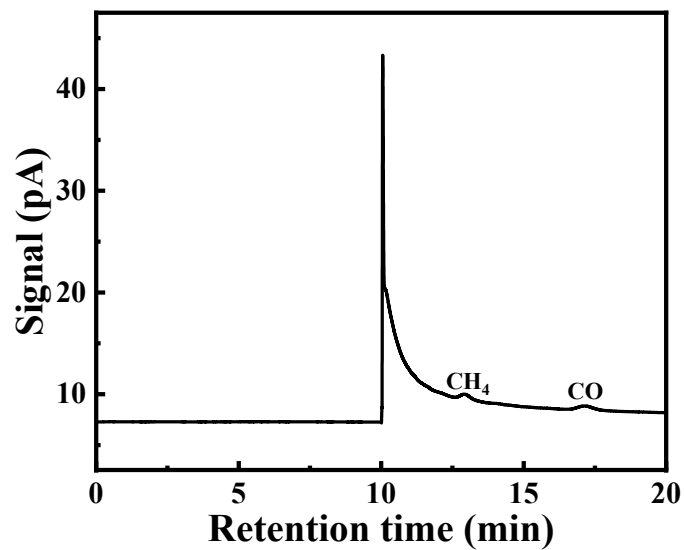

Fig. S4 FID 1 signal of the gas product

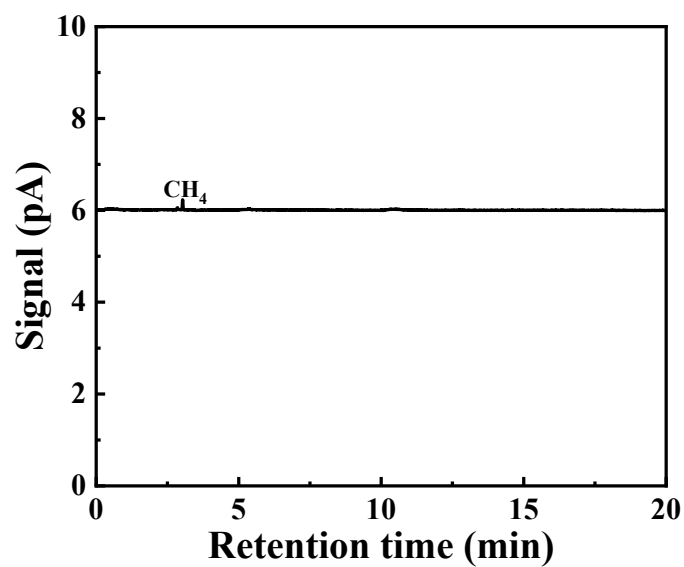

Fig. S5 FID 2 signal of the gas product

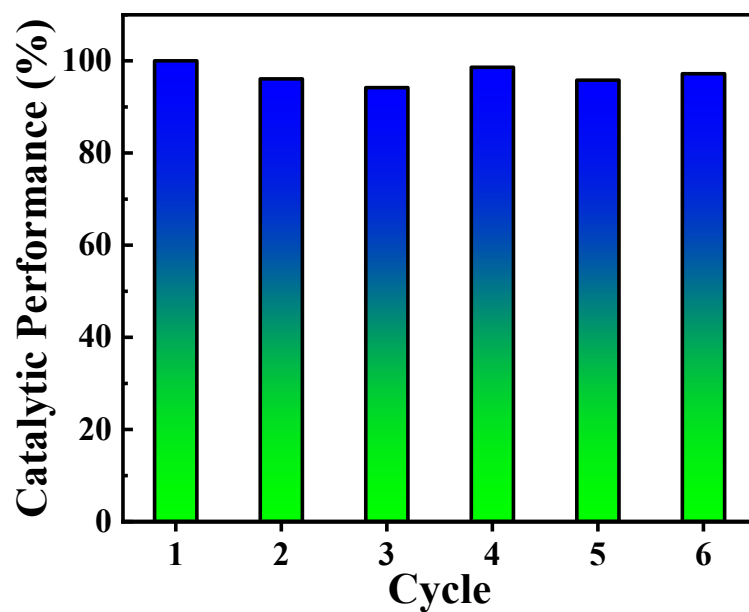

**Fig. S6** The recycling performance of NOLC400 catalyst (the catalytic performance in the recycling experiments is normalized by that of fresh NOLC400 catalyst). Reaction condition: 10 mg catalyst, 2 mmol HBpin, 100 °C, 4 MPa CO<sub>2</sub>, 2 h. After each reaction, the catalyst was separated from the reaction medium through centrifugation and washed with toluene for the next cycle.

**Table S3 The comparison of catalytic performance with the reported catalysts**

| Entry | Catalyst                                                 | TOF/h <sup>-1</sup> | Catalytic System | Reference        |
|-------|----------------------------------------------------------|---------------------|------------------|------------------|
| 1     | Co(acac) <sub>3</sub> -NaHBET <sub>3</sub>               | 15                  | Homogeneous      | 1                |
| 2     | PhSi(CH <sub>2</sub> PPh) <sub>3</sub> -Co               | 2.8                 | Homogeneous      | 2                |
| 3     | NaBH <sub>4</sub>                                        | 14.5                | Homogeneous      | 3                |
| 4     | ( <sup>t</sup> BuPCP)PdH                                 | 2.1                 | Homogeneous      | 4                |
| 5     | 1-Bcat-2-PPh <sub>2</sub> -C <sub>6</sub> H <sub>4</sub> | 17                  | Homogeneous      | 5                |
| 6     | TBD, DBU                                                 | 0.9, 3.2            | Homogeneous      | 6                |
| 7     | NOLC400                                                  | 9.5                 | Heterogeneous    | <b>This work</b> |



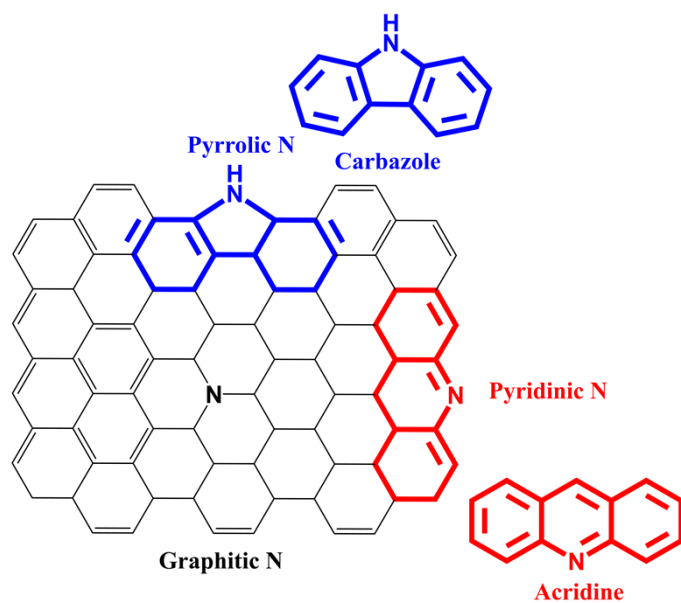

**Fig. S7** The structural model of N-doped carbon surface and the aromatic molecules containing specific N species for mimicking the N-doping structure on carbon surface

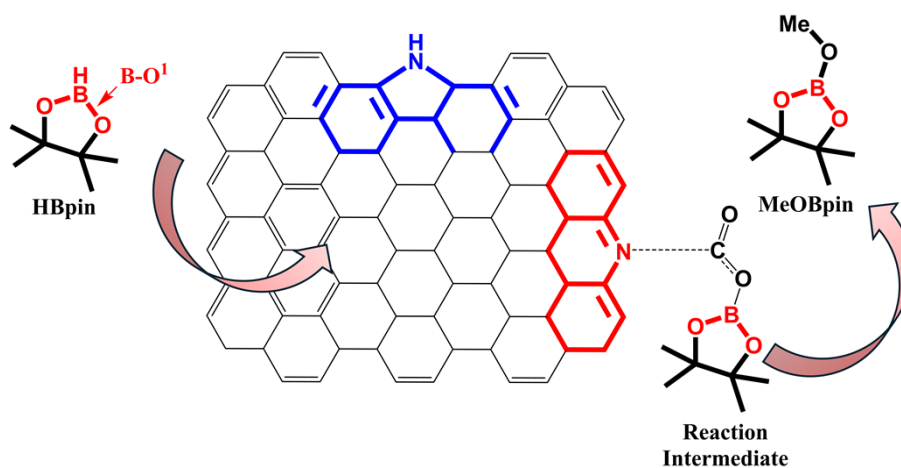

**Fig. S8** The indication of B-O<sup>1</sup> structure in the dioxaborolane ring of HBpin whose vibration mode would change in the reaction intermediate and the final product

## Reference

1. S. R. Tamang and M. Findlater, *Dalton Trans*, 2018, **47**, 8199-8203.
2. A. Aloisi, J. C. Berthet, C. Genre, P. Thuery and T. Cantat, *Dalton Trans*, 2016, **45**, 14774-14788.
3. K. Fujiwara, S. Yasuda and T. Mizuta, *Organometallics*, 2014, **33**, 6692-6695.
4. M. R. Espinosa, D. J. Charboneau, A. Garcia de Oliveira and N. Hazari, *Acs Catal*, 2018, **9**, 301-314.
5. M. A. Courtemanche, M. A. Legare, L. Maron and F. G. Fontaine, *J Am Chem Soc*, 2013, **135**, 9326-9329.
6. C. Das Neves Gomes, E. Blondiaux, P. Thuery and T. Cantat, *Chem-Eur J*, 2014, **20**, 7098-7106.
